# Supplementary material for: Conditional survival for longer-term survivors from 2000–2004 using population-based cancer registry data in Osaka, Japan
Source: PubMed Central journal article supplement (PMC3701478; doi:10.1186/1471-2407-13-304), 2013-06-22
Supplement: 1471-2407-13-304-S1.pdf [file 1471-2407-13-304-S1.pdf]

# Additional figures:

Comparison of conditional survival  
between countries, by site and stage

**Figure S1. All stages**

**Figure S2. Localised**

**Figure S3. Regional**

**Figure S4. Distant**

**Osaka:** Our data

**US:** [8] Merrill RM et al. Oncologist 2010

**Canada:** [5] Ellisson LF et al. Health Rep 2011.

**AUS QL** (Australia Queen Land): [6] Baade PD et al.  
Med J Aust 2011.

**AUS NSW** (Australia, New South Wales): [2] Yu XQ et  
al. BMC cancer 2012.

\*In the colon/rectum figures, the dashed line represents rectum results and the solid line represents colon results (as some papers provide the results separately)

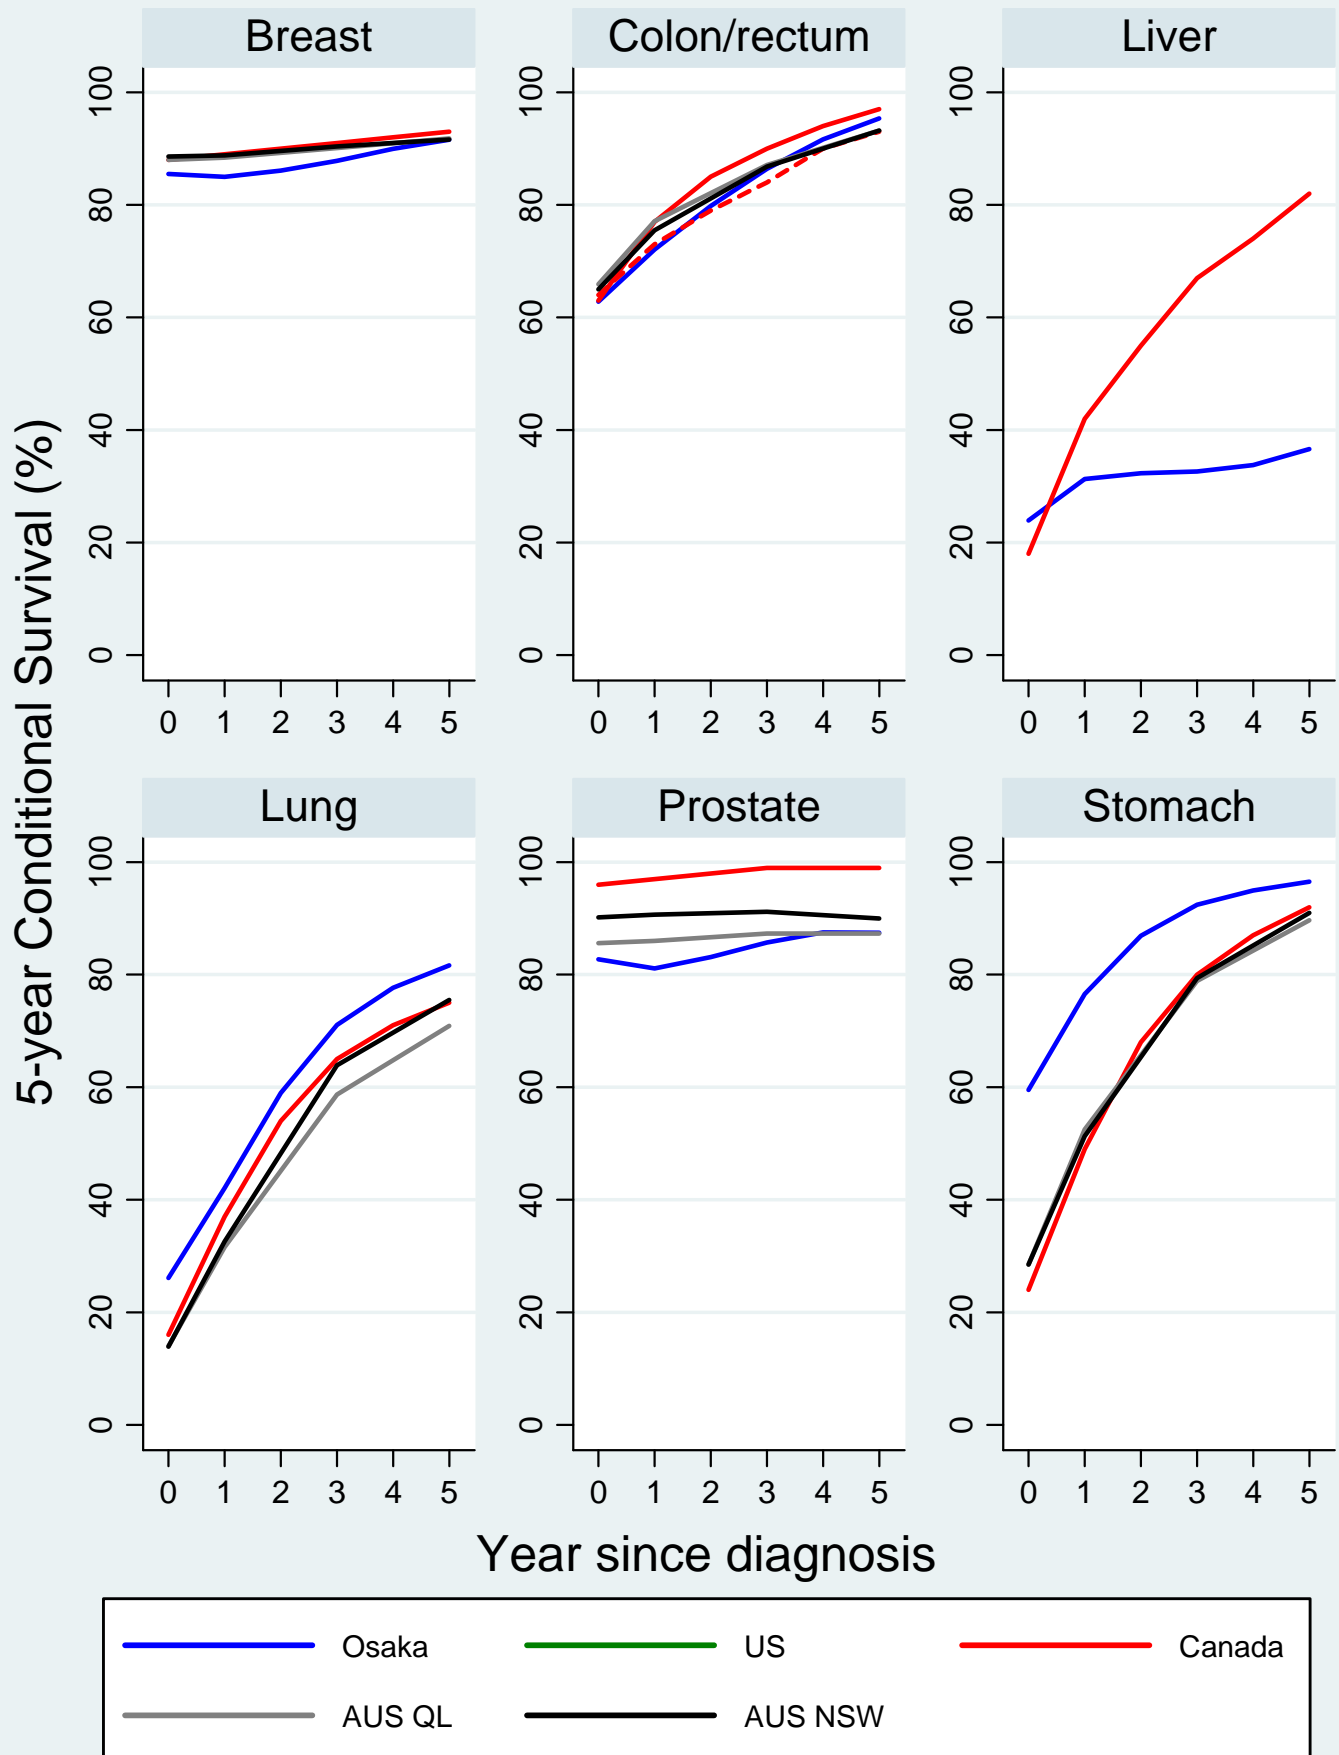

Figure S1. Comparison of five-year conditional survival between countries: All stage

In the Canada colorectal cancer the green solid line represents the colon and the green dotted line represents the rectum.

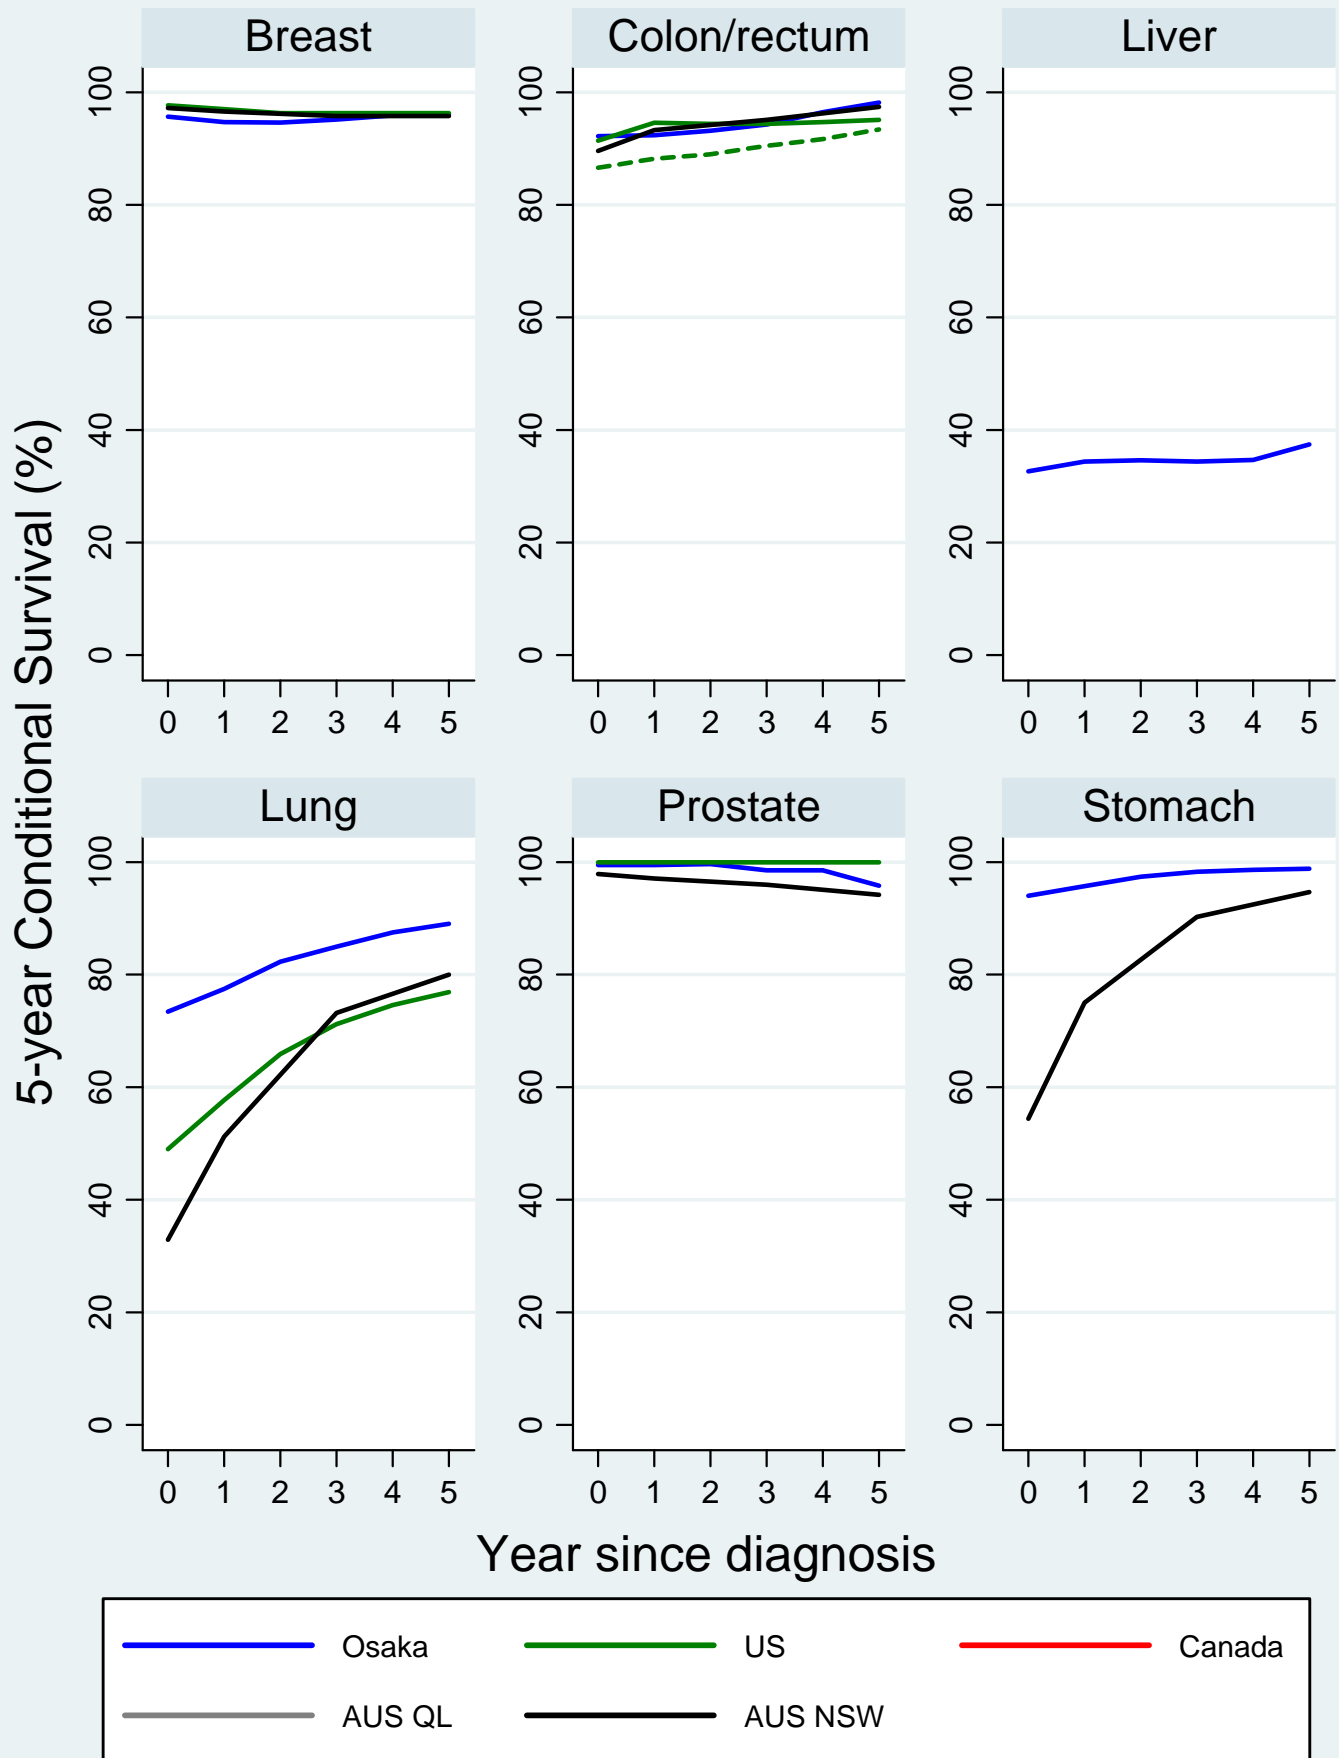

Figure S2. Comparison of five-year conditional survival between countries: Localised

In the US colorectal cancer figures the red solid line represents the colon and the red dotted line represents the rectum.

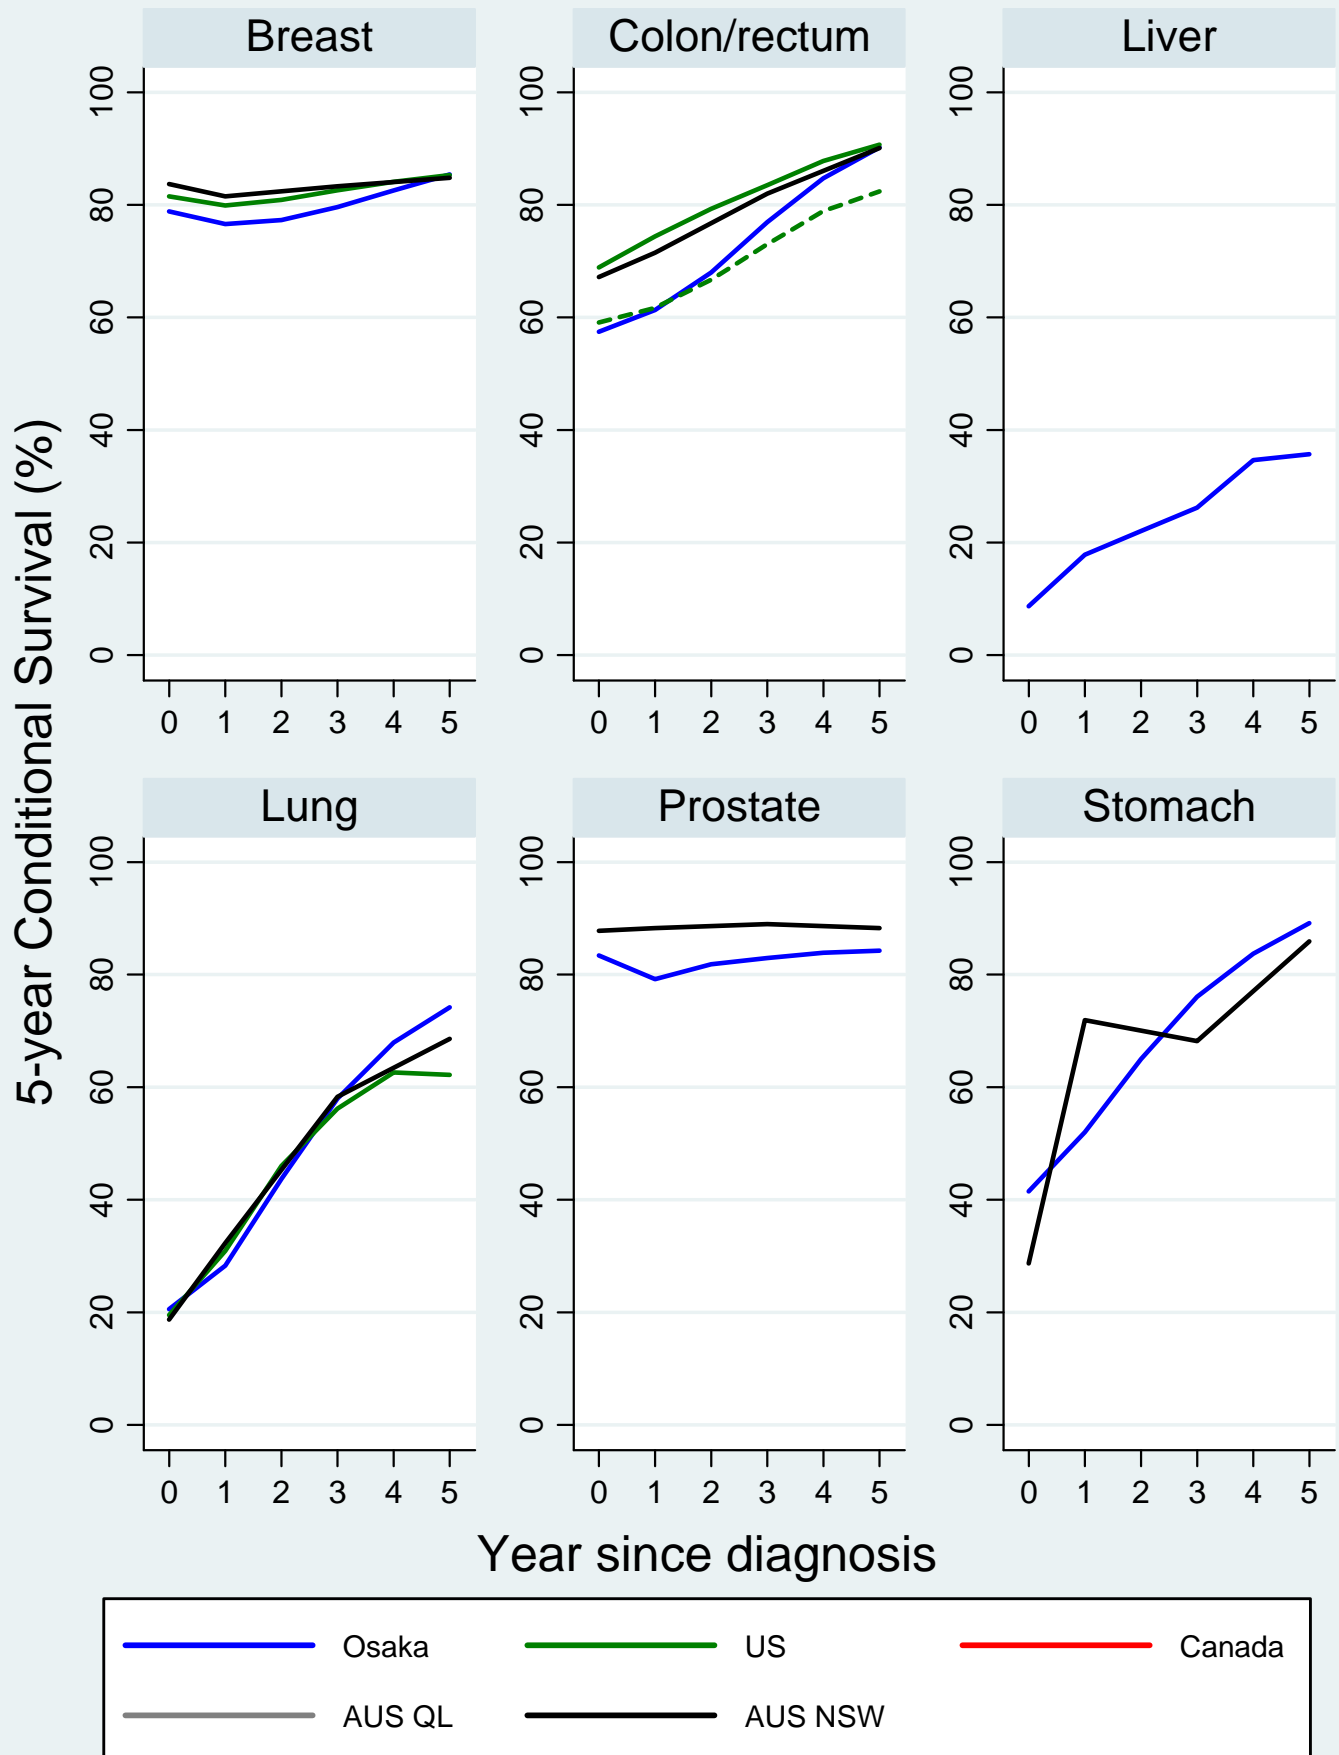

Figure S3. Comparison of five-year conditional survival between countries: Regional

In the US colorectal cancer figures the red solid line represents the colon and the red dotted line represents the rectum.

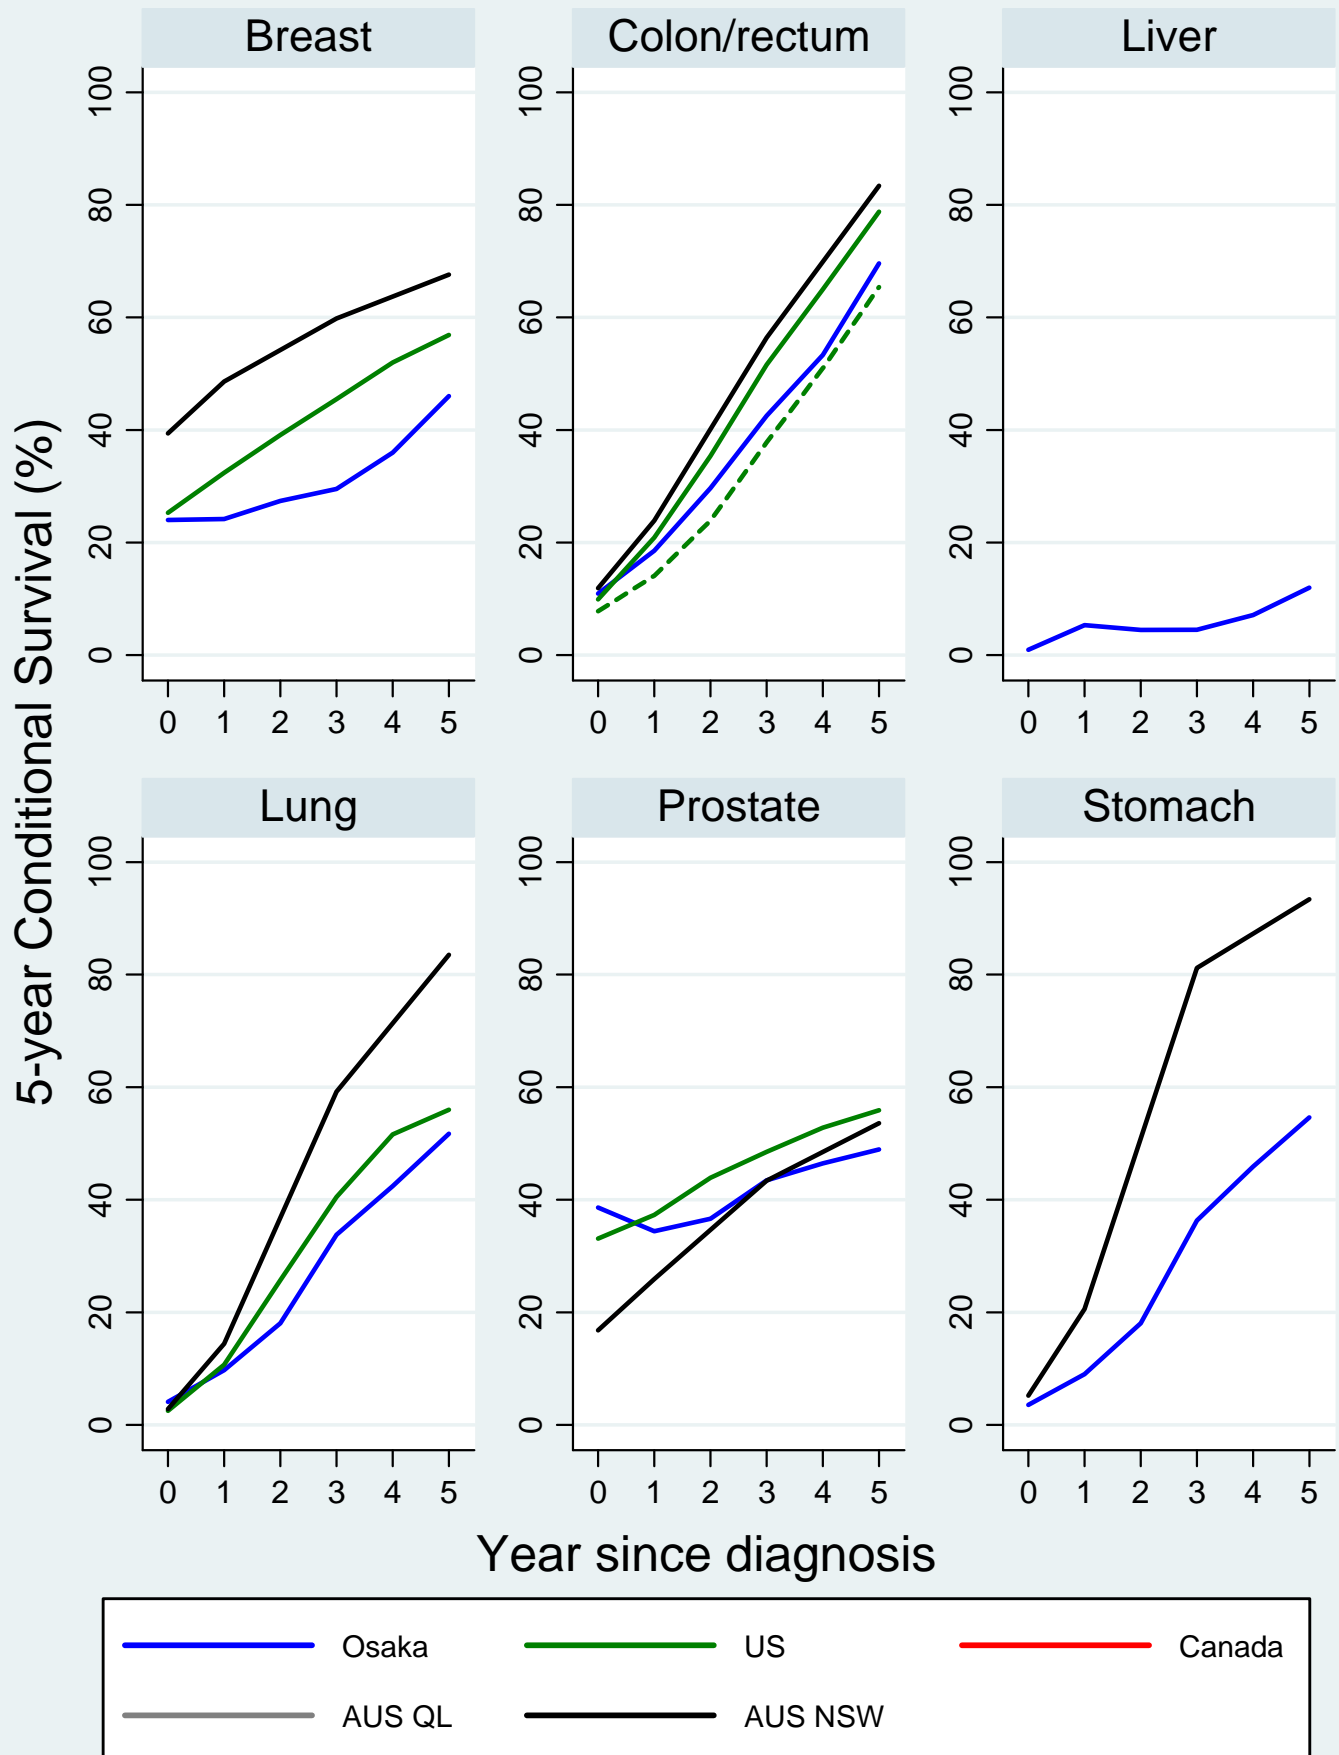

Figure S4. Comparison of five-year conditional survival between countries: Distant

In the US colorectal cancer figures the red solid line represents the colon and the red dotted line represents the rectum.
